# Supplementary material
Source: PubMed Central journal article supplement (PMC3212938)
Supplement: NIHMS304066-supplement-1.pdf [file NIHMS304066-supplement-1.pdf]

# Supplementary Data

**Probing for DNA damage with  $\beta$ -hairpins: Similarities in incision efficiencies of bulky DNA adducts by prokaryotic and human nucleotide excision repair systems *in vitro*.**

Yang Liu<sup>a</sup>, Dara Reeves<sup>a</sup>, Konstantin Kropachev<sup>a</sup>, Yuqin Cai<sup>b</sup>, Shuang Ding<sup>b</sup>, Marina Kolbanovskiy<sup>a</sup>, Alexander Kolbanovskiy<sup>a</sup>, Judith L. Bolton<sup>c</sup>, Suse Broyde<sup>b</sup>, Bennett Van Houten<sup>d</sup>, and Nicholas E. Geacintov<sup>a,\*</sup>

<sup>a</sup>Chemistry and <sup>b</sup>Biology Departments, New York University, 31 Washington Pl., New York, NY 10003; <sup>c</sup>Department of Medicinal Chemistry and Pharmacognosy, College of Pharmacy, University of Illinois at Chicago, Chicago, IL 60612, and <sup>d</sup>Department of Pharmacology and Chemical Biology, University of Pittsburgh School of Medicine, Pittsburgh, PA 15213, USA

## 11-mers

GGTAGCGATGG (VI)

GGTAGAGATGG (VII)

## 135-mer duplex VI

5' 62-mer

| 11-mer | 3' 62-mer

5'GACCTGAACACGTACGGAATTCGATATCCTCGAGCCAGATCTGCGCCAGCTGGCCACCCTGAGGTAGCGATGGGAGCG  
CCAAGCTTGGGCTGCAGCAGGTCGACTCTAGAGGATCCCGGGCGAGCTCGAATTCGC3'

## 135-mer duplex VII

5' 62-mer

| 11-mer | 3' 62-mer

5'GACCTGAACACGTACGGAATTCGATATCCTCGAGCCAGATCTGCGCCAGCTGGCCACCCTGAGGTAGAGATGGGAGCG  
CCAAGCTTGGGCTGCAGCAGGTCGACTCTAGAGGATCCCGGGCGAGCTCGAATTCGC3'

Scheme I. Sequences of 135-mer duplexes VI and VII (Figure 8). In the cases of the experiments depicted in Figure 4, the underlined portions were replaced by sequence I shown in Figure 2 (5'-CCATCG<sub>6</sub>CTACC) for the studies with *cis*- and *trans*-BP-dG<sub>6</sub> adducts .

5'-<sup>32</sup>P GAC TAC GTA CTG **TCA CAX G\*XA CAC** GCT ATC TGG CCA GAT CCG C-3'  
3'-CTG ATG CAT GAC AGT GT **Y C Y** T GTG CGA TAG ACC GGT CTA GGCG-5'

**43-mer duplexes** (Figure 5B). The sequence colored in red is IV and V in Figure 2 of the main text (X = C, or T, and Y is G or A, respectively).

5'-<sup>32</sup>P GACTACGTACTGT**CCATC<sub>5</sub>GC<sub>7</sub>TACC**GCTATCTGGCCAGATCCGC-3'  
3'-CTGATGCATGACAGGTAG C G ATGGCGATAGACCGGTCTAGGCG-5'

**43-mer duplexes** (Figure 7, 4-OHEN-dC adducts)). The sequence colored in red is I in Figure 2 (main text)

5'-<sup>32</sup>P GACTACGTACTGTTACGGCTGAGC**ATGCG<sub>6</sub>G<sub>7</sub>CCTAC**GCAATCAGGCCAGATCTGC-3'  
3' CTGATGCATGACAATGCCGACTC GTACG C C GGATGCGTTAGTCCGGTCTAGACG-5'

**54-mer duplexes** (Figures 5C and 6; *trans*-BP-dG adducts). The sequence colored in red is sequence V In Figure 2 of the main text. Sequence I (5'-**CCATCG<sub>6</sub>CTACC**) was substituted for V in the experiments with *trans*-BP-dG –I duplexes described in Figure 5C.

Scheme 2. Sequences of 43-mer and 54-mer duplexes.

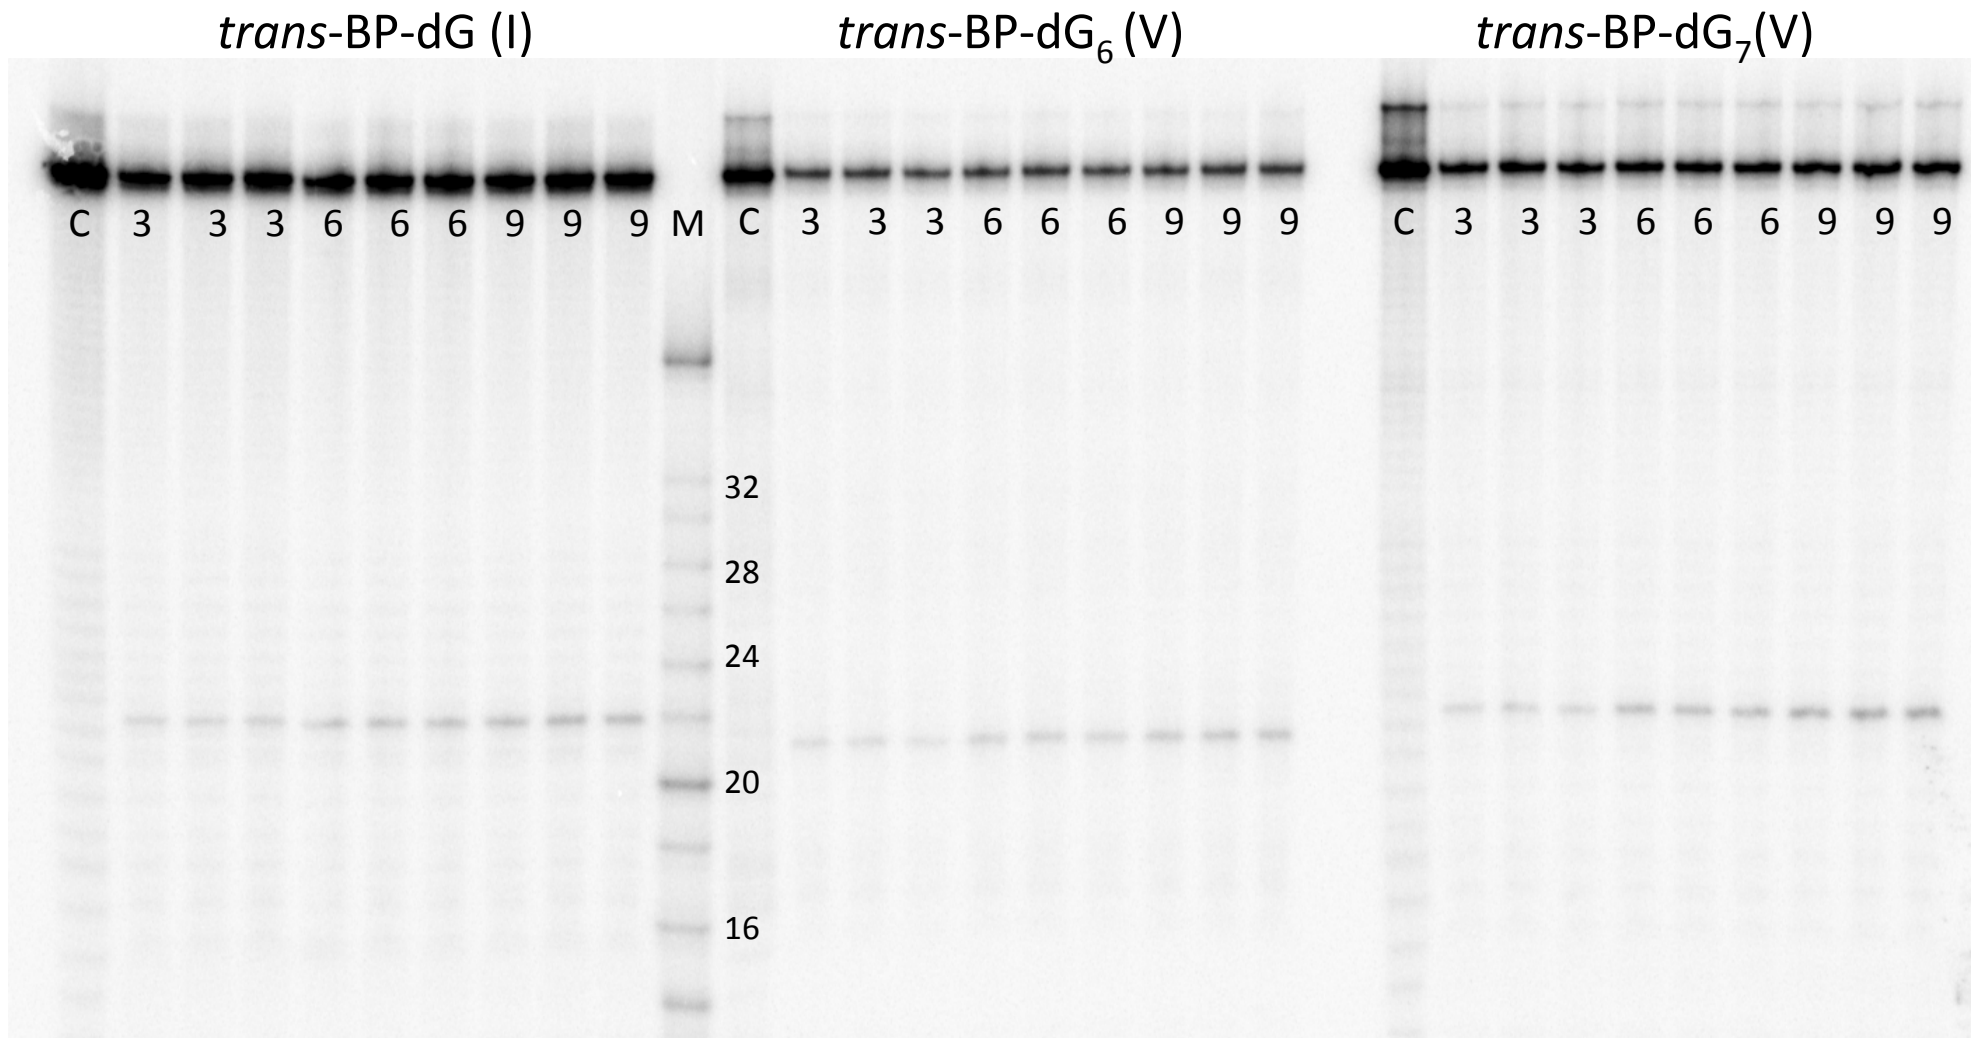

Figure S1A. Typical gel autoradiograms of experiments depicting incisions catalyzed by UvrABC<sup>Bca</sup> at 55 °C at different incubation time points of 3, 6, or 9 min, as indicated. Each identical sample was loaded three times to verify the reproducibility (these are not considered as independent experiments). C: Controls; M: size markers. The 54 nt long oligonucleotides were 5'-end-labeled, yielding 22 nt incision products in the case of *trans*-BP-dG duplexes I and -dG<sub>7</sub>(V), and 21 nt in the case of -dG<sub>6</sub> (V).

Gel 050807 Bca55

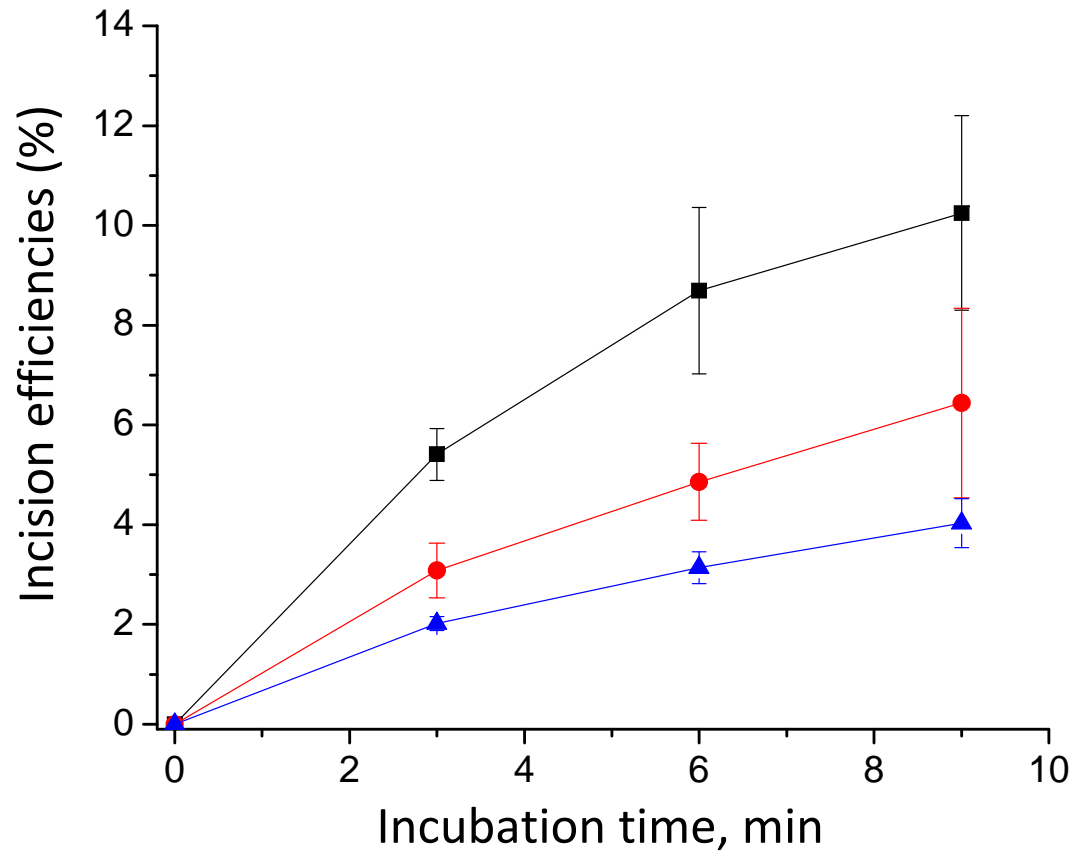

Figure S1B. Incision kinetics of *trans*-BP-dG (I) (blue), *trans*-BP-dG<sub>7</sub> (V) (red), and *trans*-BP-dG<sub>7</sub> (V) (black), catalyzed by UvrABC<sup>Bca</sup> at 55 °C as shown in Figure S1A. Averages and standard deviations are for four sets of independent experiments. The 3 min time points were used in the bar graph in Figure 5C of the main text.

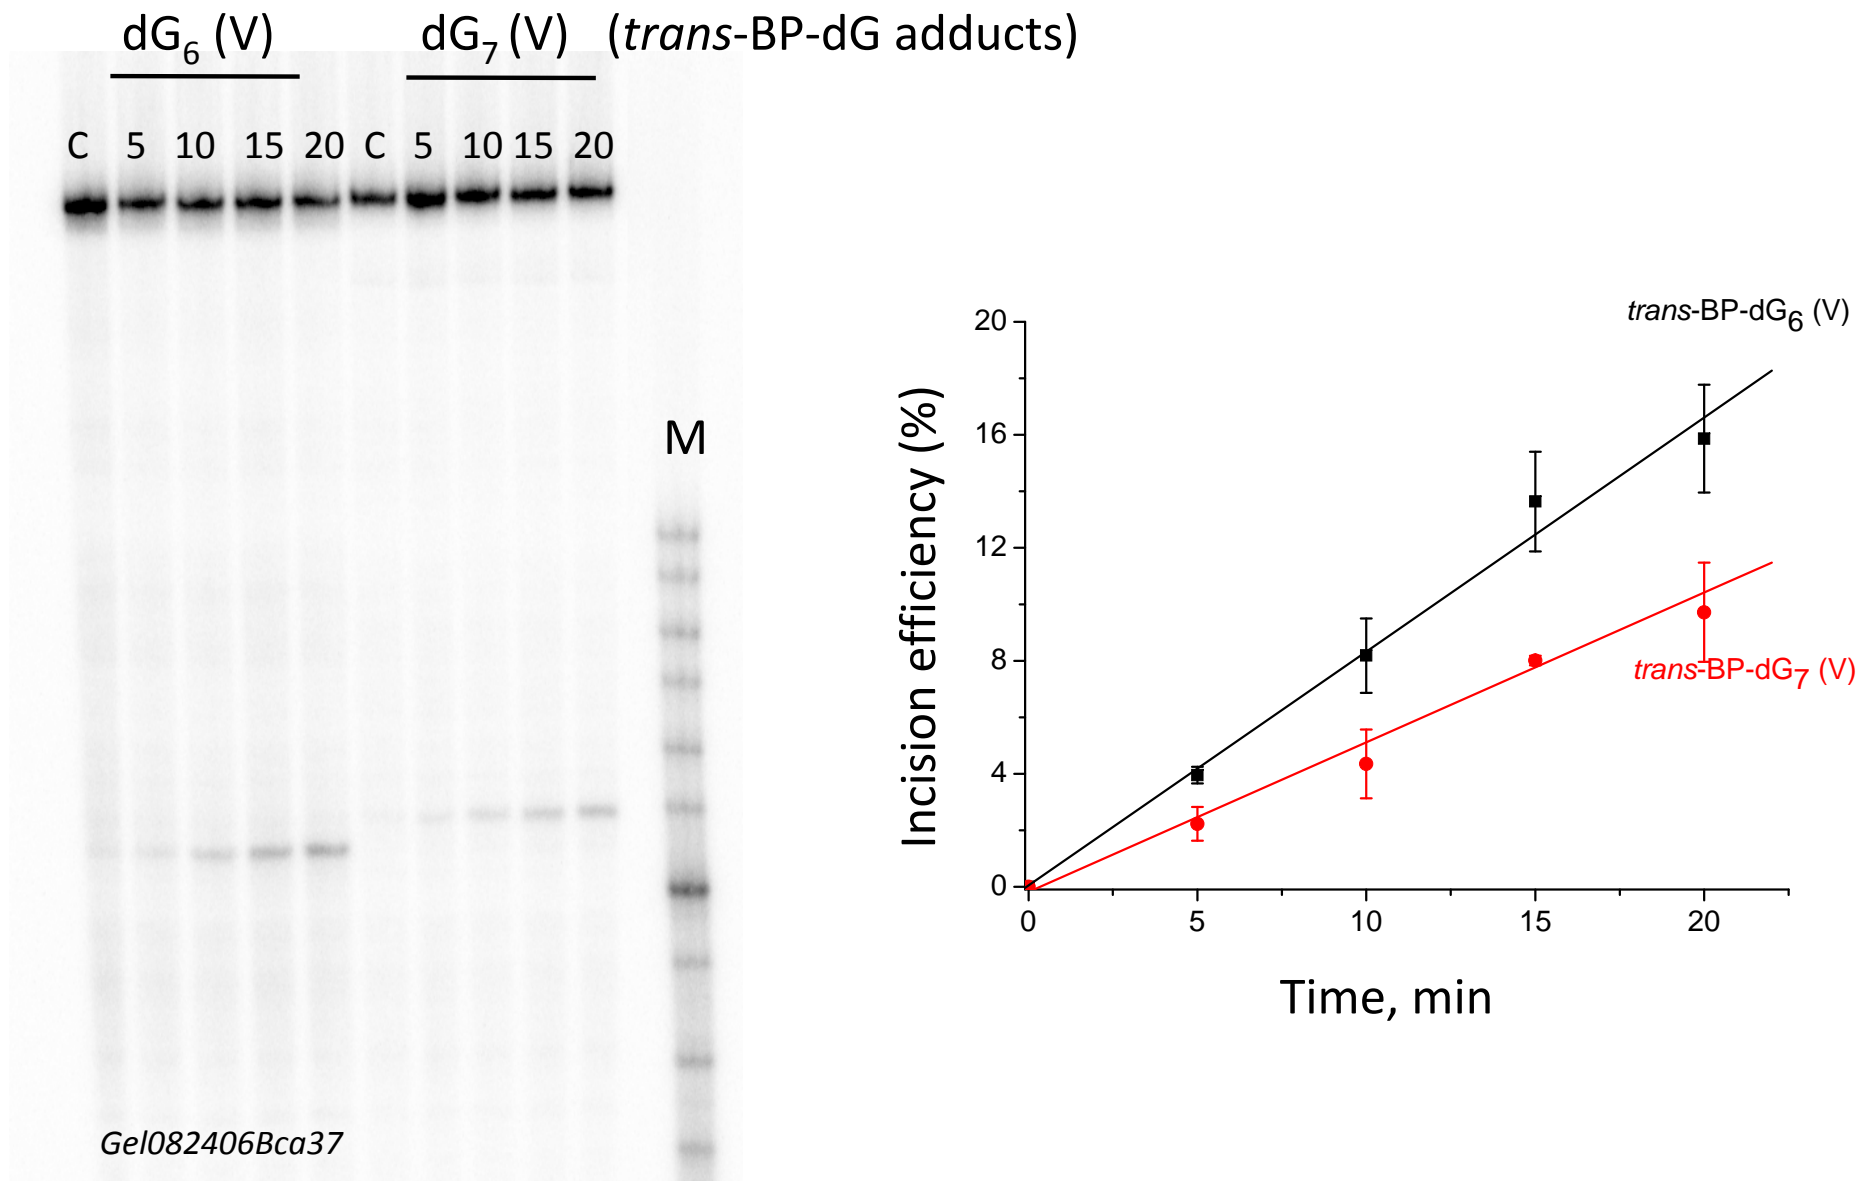

Figure S2. Typical gel autoradiograms of experiments depicting incisions catalyzed by UvrABC<sup>Bca</sup> at 37 °C at different incubation time points indicated (min). C: controls, M: markers. (Left). Incision kinetics depicting averages and standard deviations from eight independent experiments (right). The straight lines are the best linear fits to the data points. Experiments were conducted with 5'-end labeled 54-mer oligonucleotides.

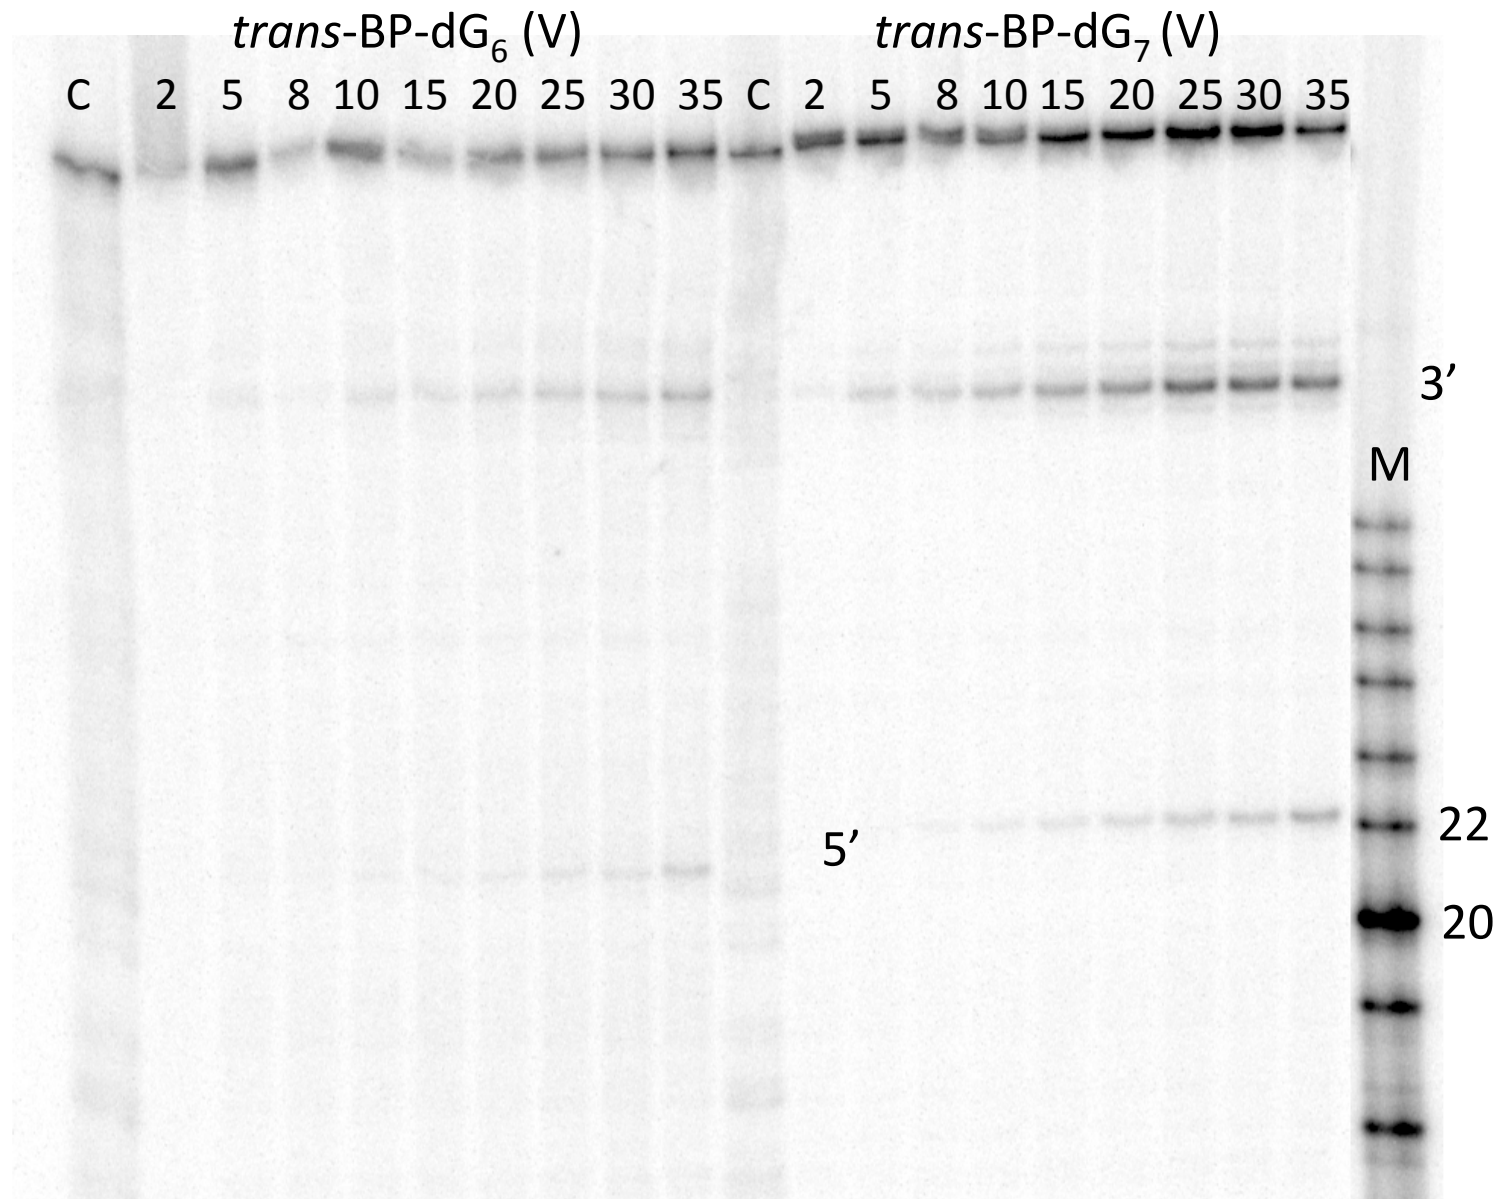

Figure S3A. Kinetics of incisions catalyzed by UvrABC<sup>Cho</sup> at 37 °C. C: Controls, M:markers. The 3'-Cho incision products are indicated (38-mers, markers not shown). The indicated 5'-incisions are attributed to traces of *E.coli* UvrC in these preparations.

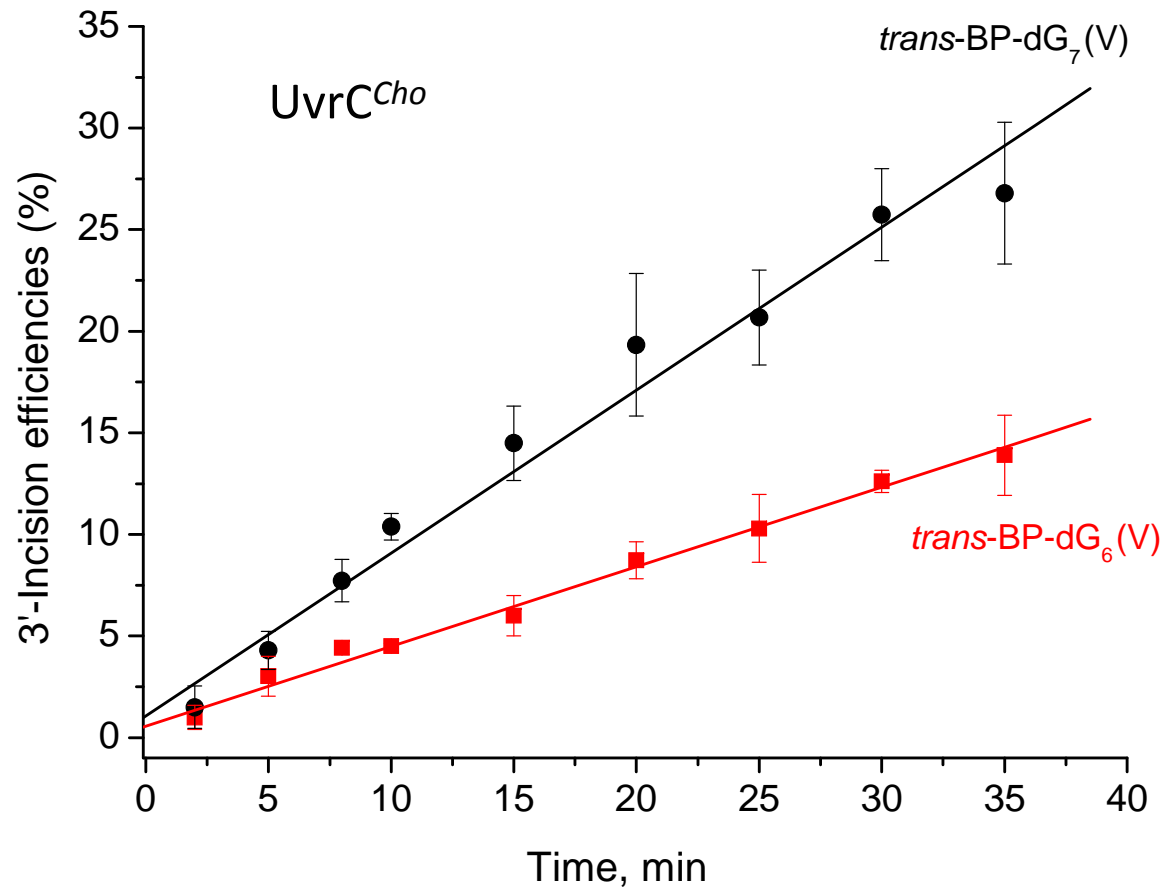

Figure S3B. Incision kinetics of duplexes V containing either the *trans*-BP-dG<sub>6</sub> or -dG<sub>7</sub> lesion by UvrABC<sup>Cho</sup> (UvrC<sup>A</sup> and UvrB were from *Bca*). The data points are averages and standard deviations from three independent experiments ; the lines are the best linear fits to the data points. Experiments were conducted with 5'-end labeled 54-mer oligonucleotides at 37 °C.



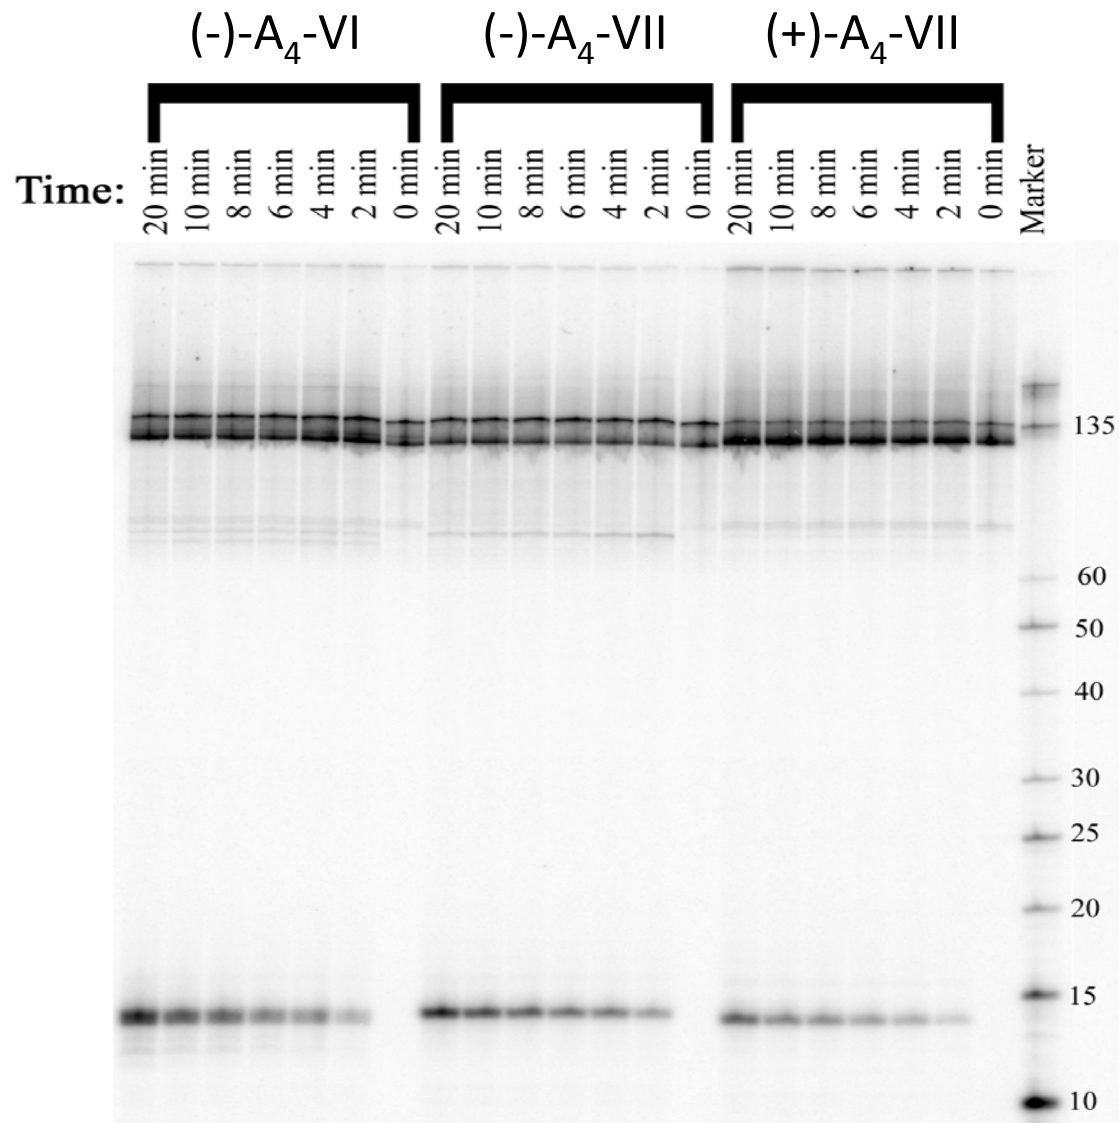

Figure S4A. Example of an autoradiogram of relative NER incision efficiencies of different stereoisomeric 4-OHEN-dA adducts in sequence contexts VI or VII embedded in the middle of internally labeled 135-mer DNA duplexes catalyzed by UvrABC<sup>Tma</sup> proteins at 55 °C.

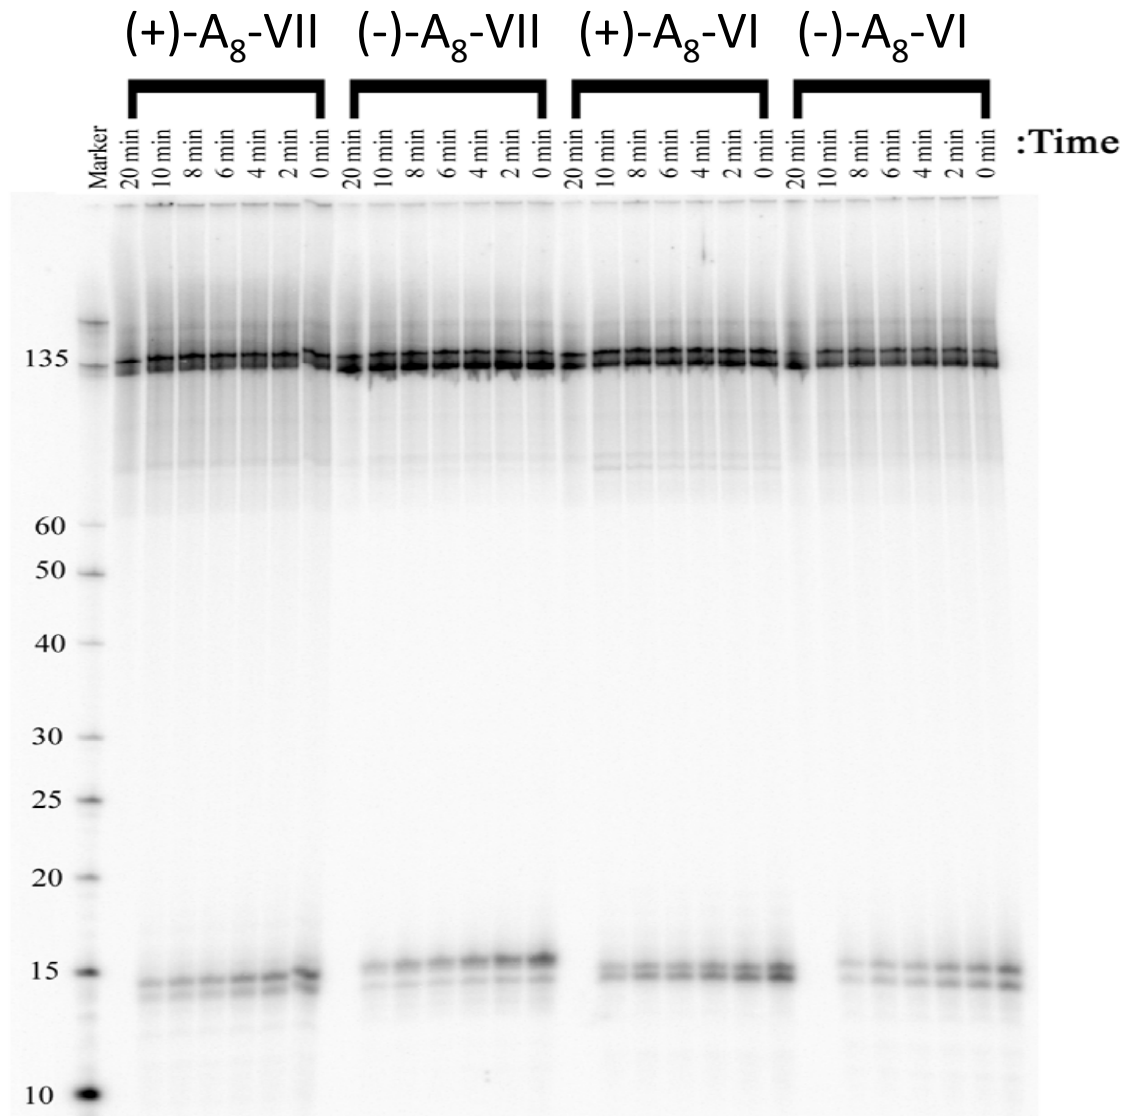

Figure S4B. Example of an autoradiogram of relative NER incision efficiencies of different stereoisomeric 4-OHEN-dA adducts in sequence contexts VI or VII embedded in the middle of internally labeled 135-mer DNA duplexes catalyzed by UvrABC<sup>Tma</sup> proteins at 55 °C.

*Gel081509*

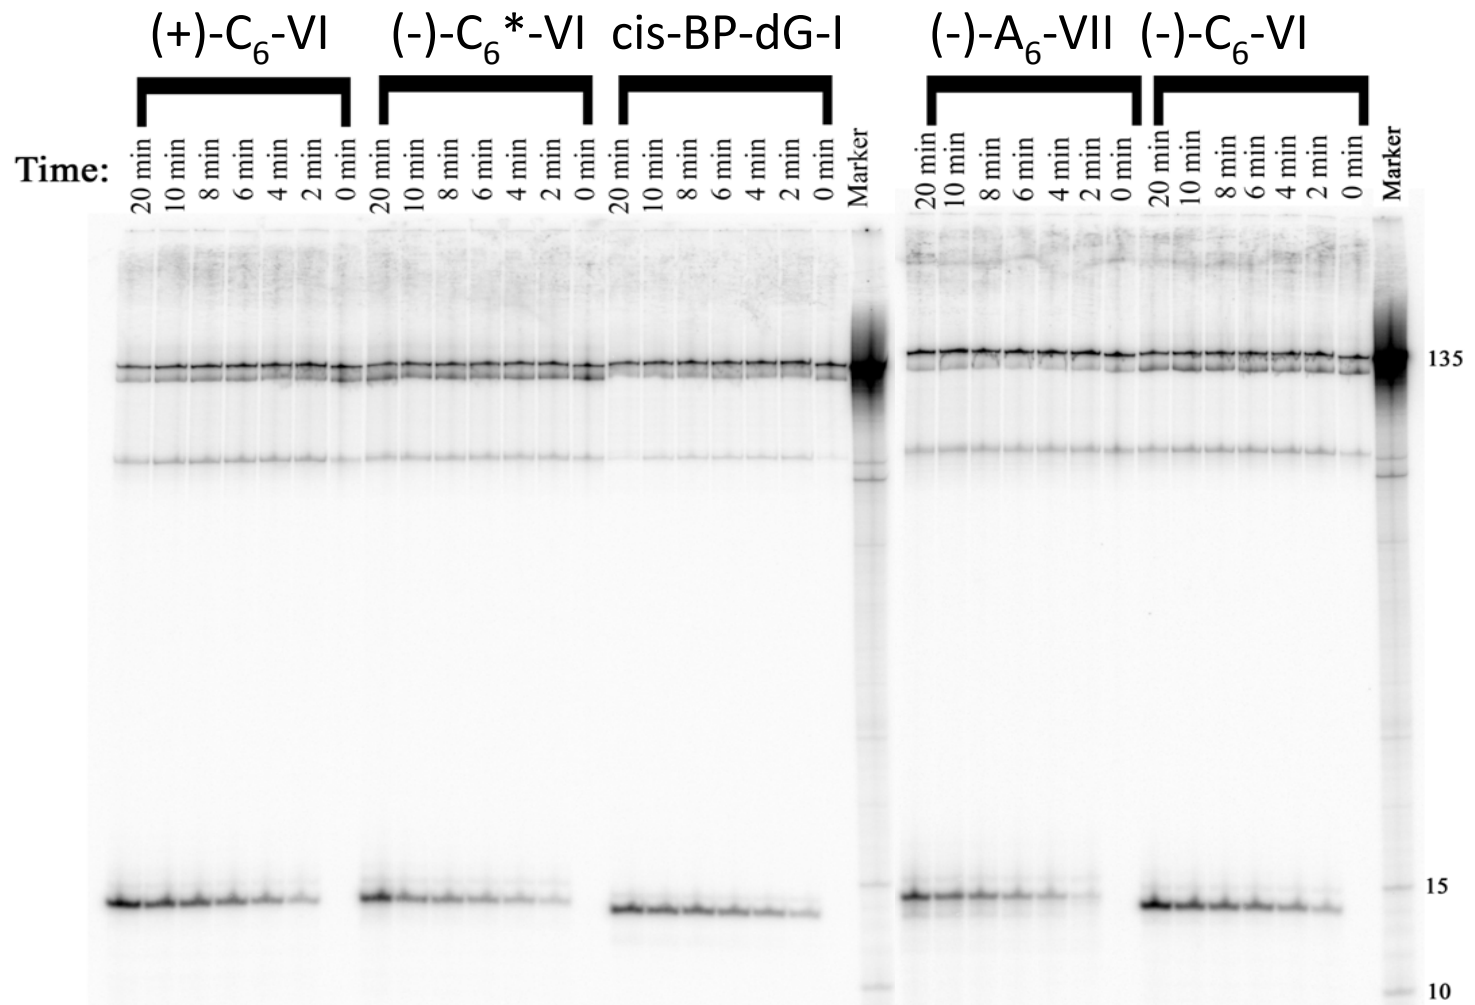

Figure S4C. Example of an autoradiogram of relative NER incision efficiencies of different stereoisomeric 4-OHEN-dA and -dC adducts in sequence contexts VI or VII embedded in the middle of internally labeled 135-mer DNA duplexes catalyzed by UvrABC<sup>Tma</sup> proteins at 55 °C. The (-)-C<sub>6</sub>\*-VI adduct is a minor 4-OHEN-dC adduct (isomer C<sup>2</sup>, Kolbanovskiy et al., *Chem Res Toxicol.* 2005 Nov;18(11):1737-47 cited in the main text) which was not investigated in detail here. The results with the *cis*-BP-dG adduct indicate that the incision efficiencies of the 4-OHEN-dC/dA adducts are not radically different.
